# Supplementary material
Source: PubMed Central journal article supplement (PMC6727986)
Supplement: NIHMS1043130-supplement-1.pdf [file NIHMS1043130-supplement-1.pdf]

# Thyroid hormone disruption in the fetal and neonatal rat: Predictive hormone measures and bioindicators of hormone action in the developing cortex

## SUPPLEMENTARY INFORMATION

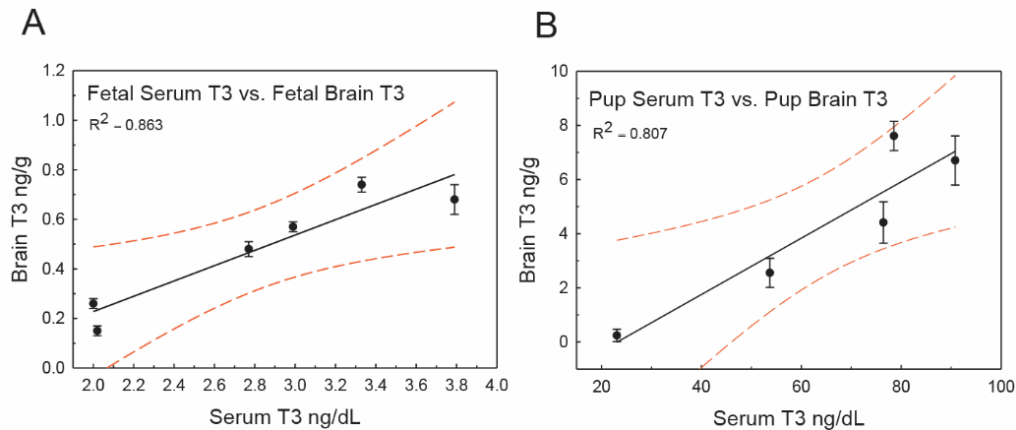

**Supplementary Figure 1. Brain T3 expressed as function of serum T3.** This relationship in the A) GD20 fetus and B) PN14 pup is linear. However, serum T4 is more highly correlated to brain T3 at both stages (compare to Figure 3C and D). Error bars represent  $\pm$  SEM, and dashed red lines the 95% confidence interval.

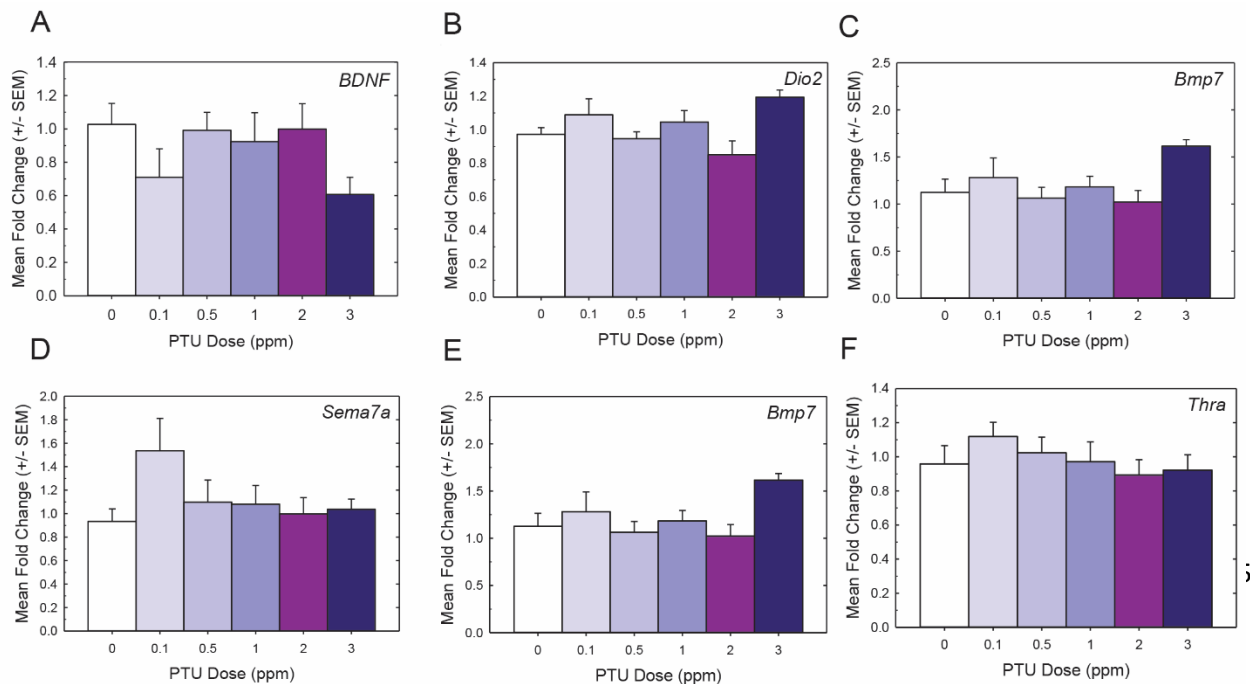

**Supplementary Figure 2. Subset of genes not differentially expressed in the GD20 forebrain.** All PTU doses represent the maternal dose administered. Error bars represent  $\pm$  SEM.

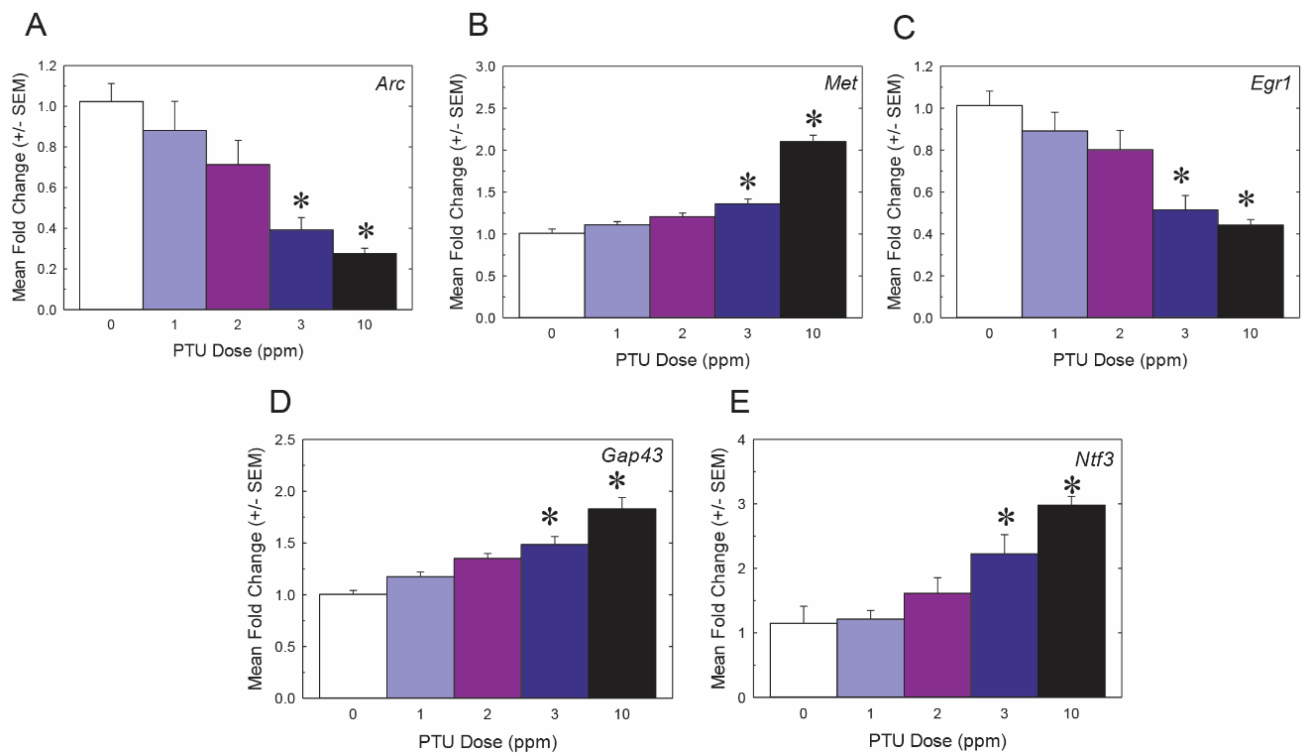

**Supplementary Figure 3. Genes differentially expressed only in response to 3 and 10 ppm PTU in PN14 neocortex.** All PTU doses represent the maternal dose administered. In all panels error bars represent  $\pm$  SEM.

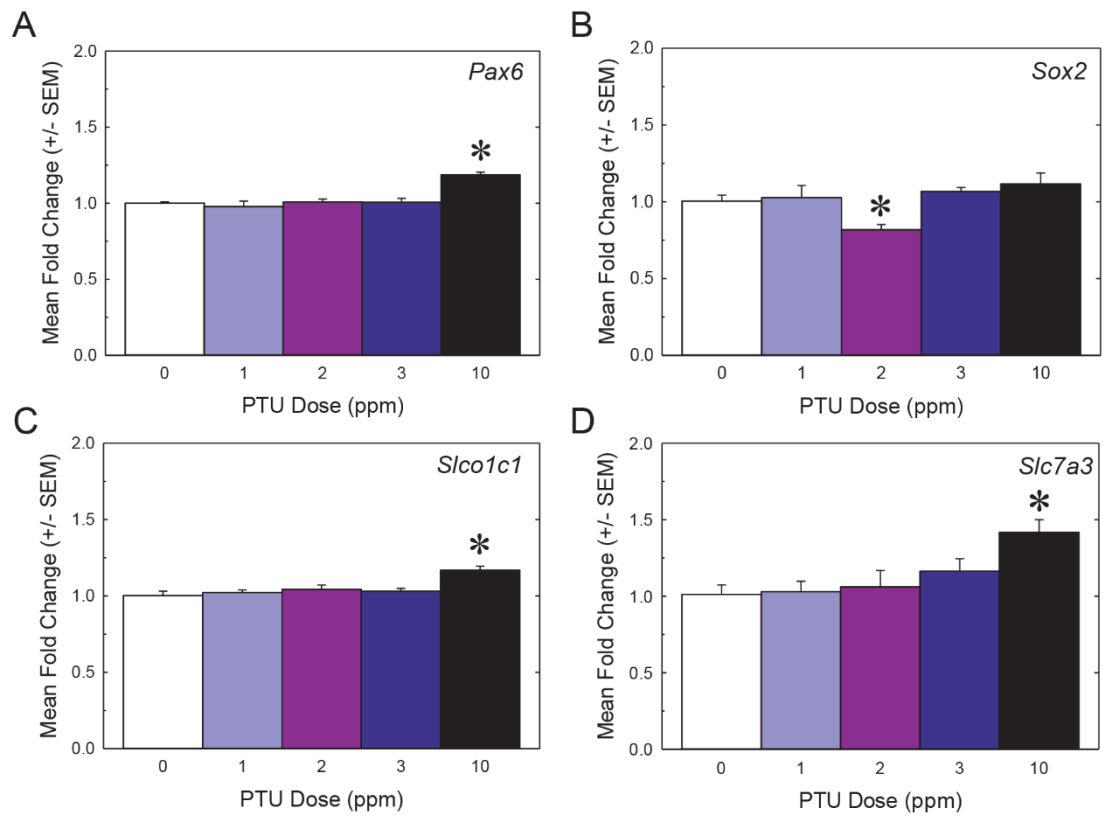

**Supplementary Figure 4. Genes differentially expressed in the PN14 brain in response to a single dose of PTU.** All PTU doses represent the maternal dose administered. In all panels error bars represent  $\pm$  SEM.

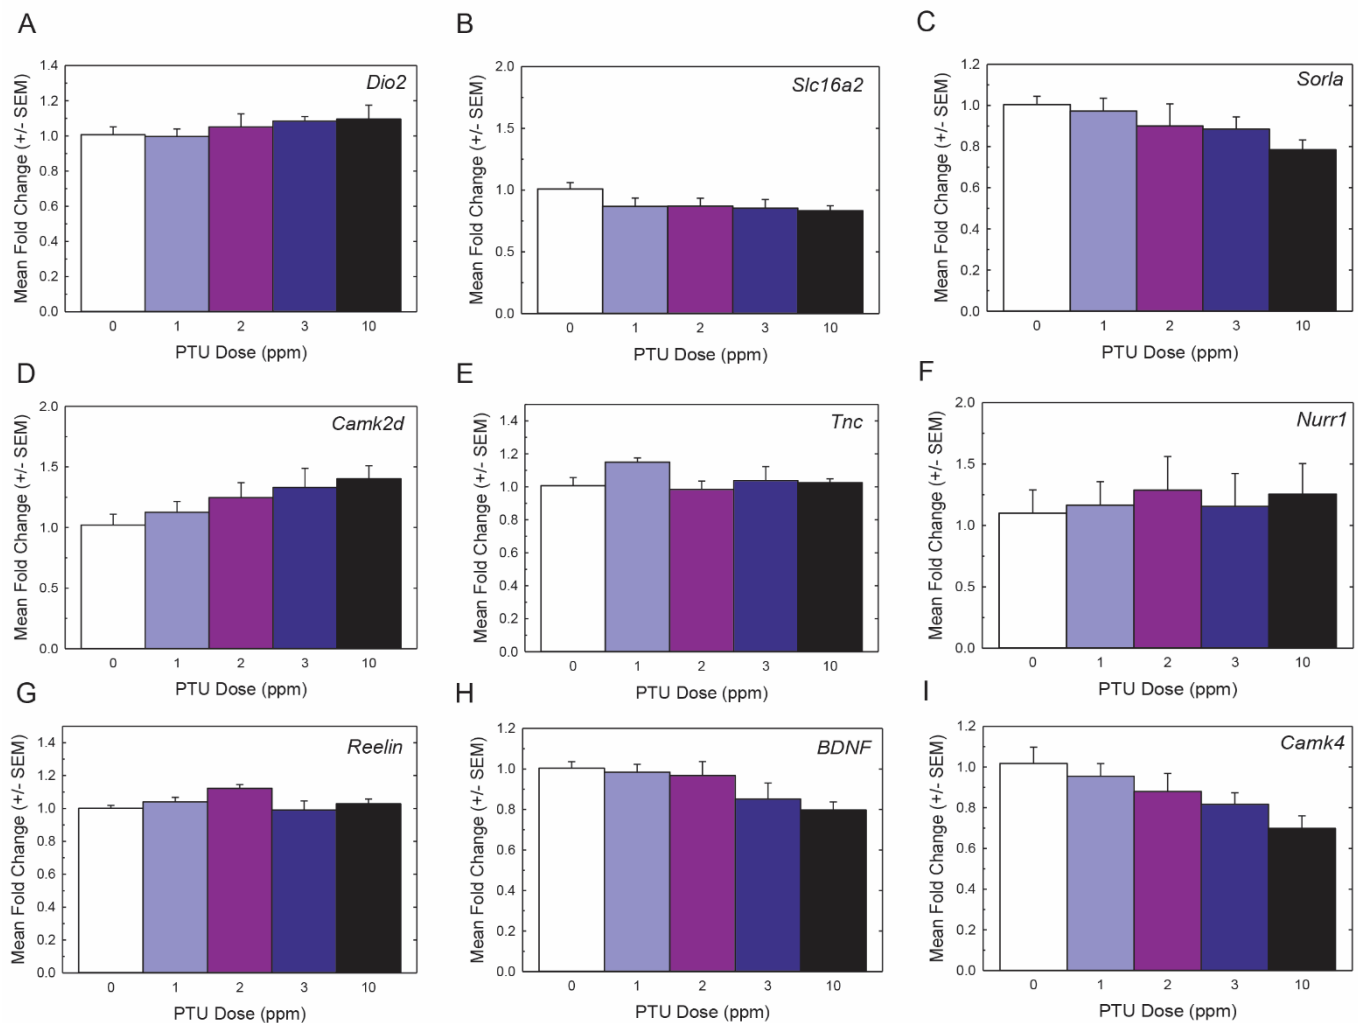

**Supplementary Figure 5. Genes not differentially expressed in the PN14 neocortex.** All PTU doses represent the maternal dose administered. In all panels error bars represent  $\pm$  SEM.

| Stage Analyzed | Gene name                                 | Gene Symbol                | NCBI Gene ID | References                                                                                                                                                                                                                                                                            |
|----------------|-------------------------------------------|----------------------------|--------------|---------------------------------------------------------------------------------------------------------------------------------------------------------------------------------------------------------------------------------------------------------------------------------------|
| GD20           | Bone morphogenetic protein 7              | <i>Bmp7</i>                | 85272        | (Shiraki <i>et al.</i> , 2014)                                                                                                                                                                                                                                                        |
| GD20           | Roundabout guidance receptor 1            | <i>Robo1</i>               | 58946        | (Gil-Ibanez <i>et al.</i> , 2017)                                                                                                                                                                                                                                                     |
| GD20           | Slit guidance ligand 2                    | <i>Slit2</i>               | 360272       | (Gil-Ibanez, Garcia-Garcia, Dopazo, Bernal and Morte, 2017; Morte <i>et al.</i> , 2010; Shiraki, Saito, Akane, Takeyoshi, Imatanaka, Itahashi, Yoshida and Shibutani, 2014)                                                                                                           |
| GD20           | Neurofilament medium polypeptide          | <i>Nefm</i>                | 24588        | (Gil-Ibanez <i>et al.</i> , 2014; Morte, Diez, Auso, Belinchon, Gil-Ibanez, Grijota-Martinez, Navarro, de Escobar, Berbel and Bernal, 2010)                                                                                                                                           |
| GD20           | Sonic hedgehog                            | <i>Shh</i>                 | 29499        | (Desouza <i>et al.</i> , 2011; Gil-Ibanez, Bernal and Morte, 2014; Gil-Ibanez, Garcia-Garcia, Dopazo, Bernal and Morte, 2017; Hasebe <i>et al.</i> , 2008; Wang <i>et al.</i> , 2014; Yu <i>et al.</i> , 2015)                                                                        |
| GD20           | Thyroid receptor alpha                    | <i>Thra</i> (TR $\alpha$ ) | 81812        | (Gil-Ibanez <i>et al.</i> , 2013)                                                                                                                                                                                                                                                     |
| GD20           | Thyroid receptor beta                     | <i>Thrb</i> (TR $\beta$ )  | 24831        | (Chatonnet <i>et al.</i> , 2013; Gil-Ibanez, Morte and Bernal, 2013)                                                                                                                                                                                                                  |
| GD20, PN14     | Calcium -dependent protein kinase type IV | <i>Camk4</i>               | 25050        | (Gil-Ibanez, Garcia-Garcia, Dopazo, Bernal and Morte, 2017; Krebs <i>et al.</i> , 1996; Morte, Diez, Auso, Belinchon, Gil-Ibanez, Grijota-Martinez, Navarro, de Escobar, Berbel and Bernal, 2010; Shiraki, Saito, Akane, Takeyoshi, Imatanaka, Itahashi, Yoshida and Shibutani, 2014) |
| GD20, PN14     | Reelin                                    | <i>Reln</i>                | 24718        | (Gil-Ibanez, Garcia-Garcia, Dopazo, Bernal and Morte, 2017; Pathak <i>et al.</i> , 2011;                                                                                                                                                                                              |

|            |                                             |               |        |                                                                                                                                                                                                                                                                                                                                                                                                                                                                                                                                                           |
|------------|---------------------------------------------|---------------|--------|-----------------------------------------------------------------------------------------------------------------------------------------------------------------------------------------------------------------------------------------------------------------------------------------------------------------------------------------------------------------------------------------------------------------------------------------------------------------------------------------------------------------------------------------------------------|
|            |                                             |               |        | Shiraki, Saito, Akane, Takeyoshi, Imatanaka, Itahashi, Yoshida and Shibutani, 2014; Sui and Li, 2010)                                                                                                                                                                                                                                                                                                                                                                                                                                                     |
| GD20, PN14 | Semaphorin 7a                               | <i>Sema7a</i> | 315711 | (Gil-Ibanez, Garcia-Garcia, Dopazo, Bernal and Morte, 2017; Shiraki, Saito, Akane, Takeyoshi, Imatanaka, Itahashi, Yoshida and Shibutani, 2014)                                                                                                                                                                                                                                                                                                                                                                                                           |
| GD20, PN14 | Hairless                                    | <i>Hr</i>     | 60563  | (Chatonnet, Guyot, Benoit and Flamant, 2013; Del Carmen Grijota-Martinez <i>et al.</i> , 2008; Gil-Ibanez, Bernal and Morte, 2014; Gil-Ibanez, Garcia-Garcia, Dopazo, Bernal and Morte, 2017; Mayerl <i>et al.</i> , 2012; Morte, Diez, Auso, Belinchon, Gil-Ibanez, Grijota-Martinez, Navarro, de Escobar, Berbel and Bernal, 2010; Potter <i>et al.</i> , 2002; Royland <i>et al.</i> , 2008a; Shiraki, Saito, Akane, Takeyoshi, Imatanaka, Itahashi, Yoshida and Shibutani, 2014; Yu, Iwasaki, Xu, Lesmana, Xiong, Shimokawa, Chin and Koibuchi, 2015) |
| GD20, PN14 | Nerve growth factor                         | <i>Ngf</i>    | 310738 | (Gilbert <i>et al.</i> , 2016; Neveu and Arenas, 1996; O'Hare <i>et al.</i> , 2015; Roskoden <i>et al.</i> , 1999; Zhang <i>et al.</i> , 2009)}                                                                                                                                                                                                                                                                                                                                                                                                           |
| GD20, PN14 | Inter-Alpha-Trypsin Inhibitor Heavy Chain 3 | <i>Itih3</i>  | 50693  | (Gil-Ibanez, Bernal and Morte, 2014; Royland, Parker and Gilbert, 2008a)                                                                                                                                                                                                                                                                                                                                                                                                                                                                                  |
| GD20, PN14 | Prepronociceptin                            | <i>Pnoc</i>   | 25516  | (Gil-Ibanez, Garcia-Garcia, Dopazo, Bernal and Morte, 2017; Morte, Diez, Auso, Belinchon, Gil-Ibanez, Grijota-Martinez, Navarro, de Escobar, Berbel and Bernal, 2010)                                                                                                                                                                                                                                                                                                                                                                                     |

|            |                                          |                |        |                                                                                                                                                                                                                                                                                                                                                                                                                                                    |
|------------|------------------------------------------|----------------|--------|----------------------------------------------------------------------------------------------------------------------------------------------------------------------------------------------------------------------------------------------------------------------------------------------------------------------------------------------------------------------------------------------------------------------------------------------------|
| GD20, PN14 | Deiodonase II                            | <i>Dio2</i>    | 65162  | (Gil-Ibanez, Garcia-Garcia, Dopazo, Bernal and Morte, 2017{Barez-Lopez, 2017 #204; Sharlin <i>et al.</i> , 2010)                                                                                                                                                                                                                                                                                                                                   |
| GD20, PN14 | Brain derived neurotrophic factor total  | <i>BDNF-t</i>  | 24225  | (Chakraborty <i>et al.</i> , 2012; Gilbert, Sanchez-Huerta and Wood, 2016; Neveu and Arenas, 1996; Shiraki, Saito, Akane, Takeyoshi, Imatanaka, Itahashi, Yoshida and Shibutani, 2014; Sui and Li, 2010; Yu, Iwasaki, Xu, Lesmana, Xiong, Shimokawa, Chin and Koibuchi, 2015)                                                                                                                                                                      |
| GD20, PN14 | Kruppel like factor 9                    | <i>Klf9</i>    | 117560 | (Chatonnet, Guyot, Benoit and Flamant, 2013; Denver and Williamson, 2009; Gil-Ibanez, Bernal and Morte, 2014; Gil-Ibanez, Garcia-Garcia, Dopazo, Bernal and Morte, 2017; Gilbert, Sanchez-Huerta and Wood, 2016; Morte, Diez, Auso, Belinchon, Gil-Ibanez, Grijota-Martinez, Navarro, de Escobar, Berbel and Bernal, 2010; Royland, Parker and Gilbert, 2008a; Shiraki, Saito, Akane, Takeyoshi, Imatanaka, Itahashi, Yoshida and Shibutani, 2014) |
| GD20, PN14 | SRY-box 2                                | <i>Sox2</i>    | 499593 | (Lemkine <i>et al.</i> , 2005; Lopez-Juarez <i>et al.</i> , 2012)                                                                                                                                                                                                                                                                                                                                                                                  |
| PN14       | Monocarboxylate transporter 8            | <i>Slc16a2</i> | 259248 | (Gil-Ibanez, Garcia-Garcia, Dopazo, Bernal and Morte, 2017; Sharlin, Gilbert, Taylor, Ferguson and Zoeller, 2010)                                                                                                                                                                                                                                                                                                                                  |
| PN14       | Organic anion transporter polypeptide 1C | <i>Slco1c1</i> | 84511  | (Mayerl, Visser, Darras, Horn and Heuer, 2012)                                                                                                                                                                                                                                                                                                                                                                                                     |
| PN14       | Solute Carrier Family 7 Member 3         | <i>Slc7a3</i>  | 64554  | (Grijota-Martinez <i>et al.</i> , 2011; Morte, Diez, Auso, Belinchon, Gil-Ibanez, Grijota-                                                                                                                                                                                                                                                                                                                                                         |



|      |                                                     |                   |        |                                                                                                                                                                        |
|------|-----------------------------------------------------|-------------------|--------|------------------------------------------------------------------------------------------------------------------------------------------------------------------------|
|      |                                                     |                   |        | Martinez, Navarro, de Escobar, Berbel and Bernal, 2010)                                                                                                                |
| PN14 | Neurotrophin-3                                      | <i>Ntf3</i>       | 81737  | (Del Carmen Grijota-Martinez, Ortega and Bernal, 2008; Gil-Ibanez, Garcia-Garcia, Dopazo, Bernal and Morte, 2017; Royland and Kodavanti, 2008)                         |
| PN14 | Growth Associated Protein 43                        | <i>Gap43</i>      | 29423  | (Shiraki, Saito, Akane, Takeyoshi, Imatanaka, Itahashi, Yoshida and Shibutani, 2014)                                                                                   |
| PN14 | Paired box 6                                        | <i>Pax6</i>       | 25509  | (Shiraki, Saito, Akane, Takeyoshi, Imatanaka, Itahashi, Yoshida and Shibutani, 2014)                                                                                   |
| PN14 | Calcium/calmodulin-dependent protein kinase type II | <i>Camk2d</i>     | 24246  | (Royland and Kodavanti, 2008)                                                                                                                                          |
| PN14 | Early growth response protein 1                     | <i>Egr1/Cuzd1</i> | 24330  | (Kobayashi <i>et al.</i> , 2009; Royland, Parker and Gilbert, 2008a)                                                                                                   |
| PN14 | Activity regulated cytoskeleton associated protein  | <i>Arc</i>        | 54323  | (Gilbert, Sanchez-Huerta and Wood, 2016; Kobayashi, Akune, Sumida, Saito, Yoshioka and Tsuji, 2009; Royland, Parker and Gilbert, 2008a; Royland <i>et al.</i> , 2008b) |
| PN14 | Angiotensinogen                                     | <i>Agt</i>        | 24179  | (Royland, Parker and Gilbert, 2008a)                                                                                                                                   |
| PN14 | Tenascin C                                          | <i>Tnc</i>        | 116640 | (Royland, Parker and Gilbert, 2008a)                                                                                                                                   |
| PN14 | Gap junction beta 6                                 | <i>Gjb6</i>       | 84403  | (Royland, Parker and Gilbert, 2008a; Shiraki, Saito, Akane, Takeyoshi, Imatanaka, Itahashi, Yoshida and Shibutani, 2014)                                               |
| PN14 | Collagen type XI alpha 2 chain                      | <i>Col11a2</i>    | 294279 | (Royland, Parker and Gilbert, 2008a; Shiraki, Saito, Akane, Takeyoshi, Imatanaka,                                                                                      |

|      |                                          |              |        |                                                                                                                                                         |
|------|------------------------------------------|--------------|--------|---------------------------------------------------------------------------------------------------------------------------------------------------------|
|      |                                          |              |        | Itahashi, Yoshida and Shibutani, 2014)                                                                                                                  |
| PN14 | Hop homeobox                             | <i>Hopx</i>  | 171160 | (Royland, Parker and Gilbert, 2008a)                                                                                                                    |
| PN14 | Nuclear receptor related 1 protein       | <i>Nurr1</i> | 54278  | (Royland, Wu, Zawia and Kodavanti, 2008b)                                                                                                               |
| PN14 | Myelin oligodendrocyte glycoprotein      | <i>Mog</i>   | 24558  | (Kobayashi, Akune, Sumida, Saito, Yoshioka and Tsuji, 2009; Royland, Parker and Gilbert, 2008a; Royland, Wu, Zawia and Kodavanti, 2008b)                |
| PN14 | Parvalbumin                              | <i>Parv</i>  | 25269  | (Gilbert <i>et al.</i> , 2007; Royland, Parker and Gilbert, 2008a; Shiraki, Saito, Akane, Takeyoshi, Imatanaka, Itahashi, Yoshida and Shibutani, 2014)} |
| PN14 | Mesenchymal-epithelial transition factor | <i>Met</i>   | 24553  | (Gil-Ibanez, Garcia-Garcia, Dopazo, Bernal and Morte, 2017)                                                                                             |
| PN14 | Sortilin Related Receptor 1              | <i>Sorla</i> | 300652 | (Gil-Ibanez, Garcia-Garcia, Dopazo, Bernal and Morte, 2017)                                                                                             |

**Supplementary Table 1. Extended version of Table 4.** Complete list of genes interrogated in this study, in addition to select references that previously reported that these transcripts were differentially regulated in the developing brain by THs; preference was given to studies using rodent models, or human cell lines, which is represented by the provided references. It is noted that these studies may have used severe anti-thyroid exposures to induce hormone insufficiency, and/or analyzed different stages than what was presented in this study.

## SUPPLEMENTARY REFERENCES

- Chakraborty, G., Magagna-Poveda, A., Parratt, C., Umans, J. G., MacLusky, N. J., and Scharfman, H. E. (2012). Reduced hippocampal brain-derived neurotrophic factor (BDNF) in neonatal rats after prenatal exposure to propylthiouracil (PTU). *Endocrinology* **153**(3), 1311-6.
- Chatonnet, F., Guyot, R., Benoit, G., and Flamant, F. (2013). Genome-wide analysis of thyroid hormone receptors shared and specific functions in neural cells. *Proceedings of the National Academy of Sciences of the United States of America* **110**(8), E766-75.
- Del Carmen Grijota-Martinez, M., Ortega, C., and Bernal, J. (2008). Direct action of triiodothyronine on gene expression in the neonatal brain and cerebellum. *Endocrinologia y nutricion : organo de la Sociedad Espanola de Endocrinologia y Nutricion* **55**(8), 319-25.
- Denver, R. J., and Williamson, K. E. (2009). Identification of a thyroid hormone response element in the mouse Kruppel-like factor 9 gene to explain its postnatal expression in the brain. *Endocrinology* **150**(8), 3935-43.
- Desouza, L. A., Sathanoori, M., Kapoor, R., Rajadhyaksha, N., Gonzalez, L. E., Kottmann, A. H., Tole, S., and Vaidya, V. A. (2011). Thyroid hormone regulates the expression of the sonic hedgehog signaling pathway in the embryonic and adult Mammalian brain. *Endocrinology* **152**(5), 1989-2000.
- Gil-Ibanez, P., Bernal, J., and Morte, B. (2014). Thyroid hormone regulation of gene expression in primary cerebrocortical cells: role of thyroid hormone receptor subtypes and interactions with retinoic acid and glucocorticoids. *PLoS one* **9**(3), e91692.
- Gil-Ibanez, P., Garcia-Garcia, F., Dopazo, J., Bernal, J., and Morte, B. (2017). Global Transcriptome Analysis of Primary Cerebrocortical Cells: Identification of Genes Regulated by Triiodothyronine in Specific Cell Types. *Cerebral cortex* **27**(1), 706-717.
- Gil-Ibanez, P., Morte, B., and Bernal, J. (2013). Role of thyroid hormone receptor subtypes alpha and beta on gene expression in the cerebral cortex and striatum of postnatal mice. *Endocrinology* **154**(5), 1940-7.
- Gilbert, M. E., Sanchez-Huerta, K., and Wood, C. (2016). Mild Thyroid Hormone Insufficiency During Development Compromises Activity-Dependent Neuroplasticity in the Hippocampus of Adult Male Rats. *Endocrinology* **157**(2), 774-87.
- Gilbert, M. E., Sui, L., Walker, M. J., Anderson, W., Thomas, S., Smoller, S. N., Schon, J. P., Phani, S., and Goodman, J. H. (2007). Thyroid hormone insufficiency during brain development reduces parvalbumin immunoreactivity and inhibitory function in the hippocampus. *Endocrinology* **148**(1), 92-102.
- Grijota-Martinez, C., Diez, D., Morreale de Escobar, G., Bernal, J., and Morte, B. (2011). Lack of action of exogenously administered T3 on the fetal rat brain despite expression of the monocarboxylate transporter 8. *Endocrinology* **152**(4), 1713-21.

- Hasebe, M., Ohta, E., Imagawa, T., and Uehara, M. (2008). Expression of sonic hedgehog regulates morphological changes of rat developing cerebellum in hypothyroidism. *The Journal of toxicological sciences* **33**(4), 473-7.
- Kobayashi, K., Akune, H., Sumida, K., Saito, K., Yoshioka, T., and Tsuji, R. (2009). Perinatal exposure to PTU decreases expression of Arc, Homer 1, Egr 1 and Kcna 1 in the rat cerebral cortex and hippocampus. *Brain research* **1264**, 24-32.
- Krebs, J., Means, R. L., and Honegger, P. (1996). Induction of calmodulin kinase IV by the thyroid hormone during the development of rat brain. *The Journal of biological chemistry* **271**(19), 11055-8.
- Lemkine, G. F., Raj, A., Alfama, G., Turque, N., Hassani, Z., Alegria-Prevot, O., Samarut, J., Levi, G., and Demeneix, B. A. (2005). Adult neural stem cell cycling in vivo requires thyroid hormone and its alpha receptor. *FASEB journal : official publication of the Federation of American Societies for Experimental Biology* **19**(7), 863-5.
- Lopez-Juarez, A., Remaud, S., Hassani, Z., Jolivet, P., Pierre Simons, J., Sontag, T., Yoshikawa, K., Price, J., Morvan-Dubois, G., and Demeneix, B. A. (2012). Thyroid hormone signaling acts as a neurogenic switch by repressing Sox2 in the adult neural stem cell niche. *Cell stem cell* **10**(5), 531-43.
- Mayerl, S., Visser, T. J., Darras, V. M., Horn, S., and Heuer, H. (2012). Impact of Oatp1c1 deficiency on thyroid hormone metabolism and action in the mouse brain. *Endocrinology* **153**(3), 1528-37.
- Morte, B., Diez, D., Auso, E., Belinchon, M. M., Gil-Ibanez, P., Grijota-Martinez, C., Navarro, D., de Escobar, G. M., Berbel, P., and Bernal, J. (2010). Thyroid hormone regulation of gene expression in the developing rat fetal cerebral cortex: prominent role of the Ca<sup>2+</sup>/calmodulin-dependent protein kinase IV pathway. *Endocrinology* **151**(2), 810-20.
- Neveu, I., and Arenas, E. (1996). Neurotrophins promote the survival and development of neurons in the cerebellum of hypothyroid rats in vivo. *The Journal of cell biology* **133**(3), 631-46.
- O'Hare, E., Kim, E. M., Page, D., and Reid, R. (2015). Effects of thyroxine treatment on histology and behavior using the methimazole model of congenital hypothyroidism in the rat. *Neuroscience* **285**, 128-38.
- Pathak, A., Sinha, R. A., Mohan, V., Mitra, K., and Godbole, M. M. (2011). Maternal thyroid hormone before the onset of fetal thyroid function regulates reelin and downstream signaling cascade affecting neocortical neuronal migration. *Cerebral cortex* **21**(1), 11-21.
- Potter, G. B., Zarach, J. M., Sisk, J. M., and Thompson, C. C. (2002). The thyroid hormone-regulated corepressor hairless associates with histone deacetylases in neonatal rat brain. *Molecular endocrinology* **16**(11), 2547-60.

- Roskoden, T., Heese, K., Otten, U., and Schwegler, H. (1999). Modulation of mRNA expression of the neurotrophins of the nerve-growth-factor family and their receptors in the septum and hippocampus of rats after transient postnatal thyroxine treatment. II. Effects on p75 and trk receptor expression. *Experimental brain research* **127**(3), 307-13.
- Royland, J. E., and Kodavanti, P. R. (2008). Gene expression profiles following exposure to a developmental neurotoxicant, Aroclor 1254: pathway analysis for possible mode(s) of action. *Toxicology and applied pharmacology* **231**(2), 179-96.
- Royland, J. E., Parker, J. S., and Gilbert, M. E. (2008a). A genomic analysis of subclinical hypothyroidism in hippocampus and neocortex of the developing rat brain. *Journal of neuroendocrinology* **20**(12), 1319-38.
- Royland, J. E., Wu, J., Zawia, N. H., and Kodavanti, P. R. (2008b). Gene expression profiles in the cerebellum and hippocampus following exposure to a neurotoxicant, Aroclor 1254: developmental effects. *Toxicology and applied pharmacology* **231**(2), 165-78.
- Sharlin, D. S., Gilbert, M. E., Taylor, M. A., Ferguson, D. C., and Zoeller, R. T. (2010). The nature of the compensatory response to low thyroid hormone in the developing brain. *Journal of neuroendocrinology* **22**(3), 153-65.
- Shiraki, A., Saito, F., Akane, H., Takeyoshi, M., Imatanaka, N., Itahashi, M., Yoshida, T., and Shibutani, M. (2014). Expression alterations of genes on both neuronal and glial development in rats after developmental exposure to 6-propyl-2-thiouracil. *Toxicology letters* **228**(3), 225-34.
- Sui, L., and Li, B. M. (2010). Effects of perinatal hypothyroidism on regulation of reelin and brain-derived neurotrophic factor gene expression in rat hippocampus: Role of DNA methylation and histone acetylation. *Steroids* **75**(12), 988-97.
- Wang, Y., Wang, Y., Dong, J., Wei, W., Song, B., Min, H., Yu, Y., Lei, X., Zhao, M., Teng, W., et al. (2014). Developmental hypothyroxinemia and hypothyroidism reduce proliferation of cerebellar granule neuron precursors in rat offspring by downregulation of the sonic hedgehog signaling pathway. *Molecular neurobiology* **49**(3), 1143-52.
- Yu, L., Iwasaki, T., Xu, M., Lesmana, R., Xiong, Y., Shimokawa, N., Chin, W. W., and Koibuchi, N. (2015). Aberrant cerebellar development of transgenic mice expressing dominant-negative thyroid hormone receptor in cerebellar Purkinje cells. *Endocrinology* **156**(4), 1565-76.
- Zhang, L., Blomgren, K., Kuhn, H. G., and Cooper-Kuhn, C. M. (2009). Effects of postnatal thyroid hormone deficiency on neurogenesis in the juvenile and adult rat. *Neurobiology of disease* **34**(2), 366-74.
